# Supplementary material for: Simultaneous orientation and 3D localization microscopy with a Vortex point spread function
Source: PubMed Central journal article supplement (PMC8505439; doi:10.1038/s41467-021-26228-5), 2021-10-11
Supplement: 41467_2021_26228_MOESM3_ESM.pdf [file 41467_2021_26228_MOESM3_ESM.pdf]

### **Description of Additional Supplementary Files**

Supplementary Movie 1 :

Re-orienting single ATTO 565 molecules in air imaged with the Vortex PSF and TIRF illumination with an exposure time of 900 ms.
